# Supplementary material for: COVID-19 mRNA vaccine induced antibody responses against three SARS-CoV-2 variants
Source: PubMed Central journal article supplement (PMC8239026; doi:10.1038/s41467-021-24285-4), 2021-06-28
Supplement: 41467_2021_24285_MOESM1_ESM.pdf [file 41467_2021_24285_MOESM1_ESM.pdf]

**Supplementary Information**  
**for COVID-19 mRNA vaccine induced antibody responses and neutralizing**  
**antibodies against three SARS-CoV-2 variants**

Pinja Jalkanen, Pekka Kolehmainen, Hanni K. Häkkinen, Moona Huttunen, Paula A.  
Tähtinen, Rickard Lundberg, Sari Maljanen, Arttu Reinholm, Sisko Tauriainen, Sari H.  
Pakkanen, Iris Levonen, Arttu Nousiainen, Taru Miller, Hanna Välimaa, Lauri Ivaska, Arja  
Pasternack, Rauno Naves, Olli Ritvos, Pamela Österlund, Suvi Kuivanen, Teemu Smura,  
Jussi Hepojoki, Olli Vapalahti, Johanna Lempainen, Laura Kakkola, Anu Kantele, Ilkka  
Julkunen

**Contents**

Supplementary Figures 1-3

Supplementary Table 1

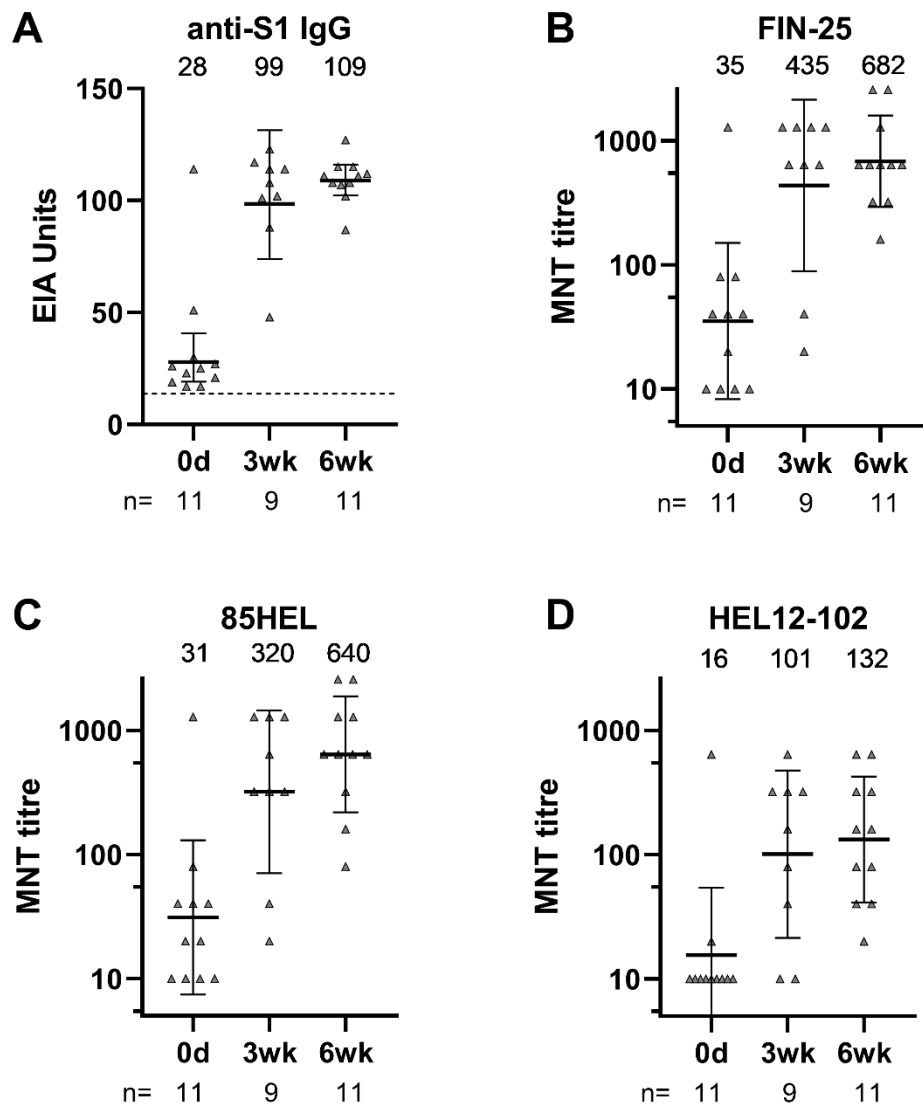

**Supplementary Fig. 1 Antibody responses in BNT162b2 vaccinated health care workers with pre-existing anti-S1 IgG antibodies.** **A.** Anti-S1 IgG antibody responses in 1:300 serum dilutions were determined with EIA. **B-D.** Neutralizing antibody titres against D614G variant FIN-25 (B), B.1.1.7 variant 85HEL (C) and B.1.351 variant HEL12-102 (D) determined with microneutralization test (MNT). Sequential serum samples were collected before vaccination (0d), and three (3wk) and six (6wk; 3 wk after the second vaccine dose) weeks after the first dose of the BNT162b2 vaccine. Geometric means are indicated on top of the graphs and data are presented as geometric means and geometric SDs. Dotted line (A) represents the cut-off value in IgG EIA. In MNT (B) samples with a titre value of <20 (considered negative) is given a value of 10. N refers to the number of serum specimens analysed.

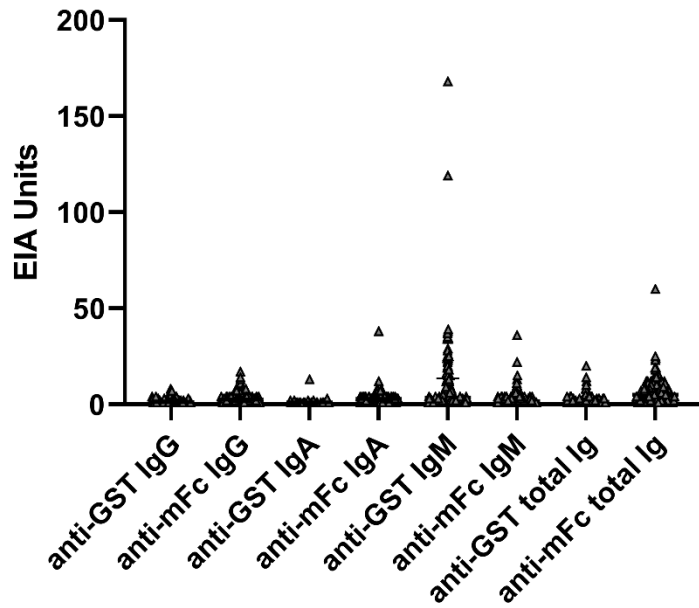

**Supplementary Fig. 2 IgG, IgA, IgM and total Ig antibody responses against negative control antigens in serum samples collected from study participants before BNT162b2 vaccination (n=180).** GST was used as a negative control antigen for recombinant SARS-CoV-2 nucleoprotein (N) and mouse promyostatin (ProMstn)-mFc(IgG2a)-6xhis protein, indicated as mFc, was used as a negative control for recombinant SARS-CoV-2 spike S1 domain. Data are presented as geometric means and geometric SDs.

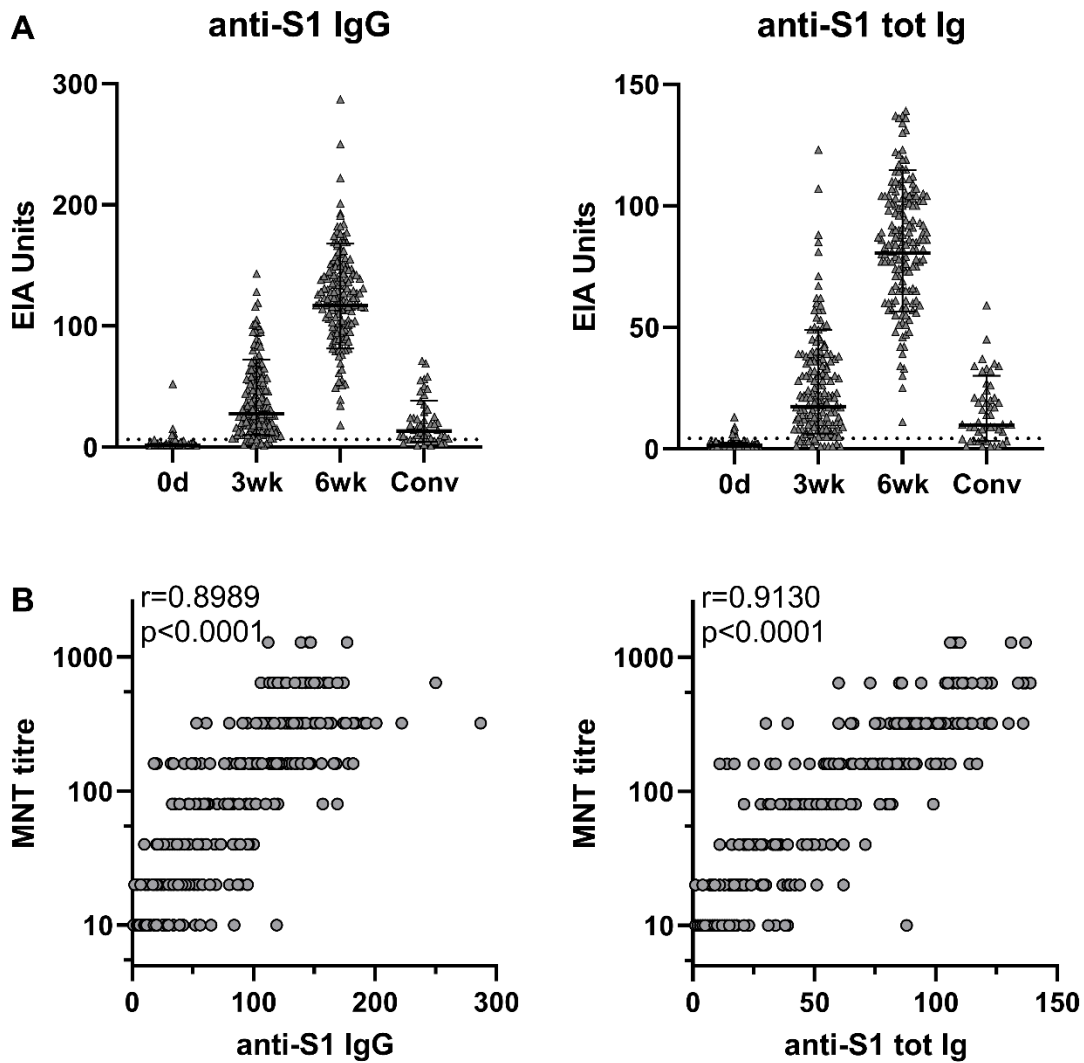

**Supplementary Fig. 3 Anti-S1 antibody responses in BNT162b2 vaccinated health care workers determined in high serum dilutions. A.** IgG and total Ig antibody levels were measured with S1-based EIA in 1:1000 serum dilution (n=159). Sequential serum samples were collected before vaccination (0d), and three (3wk) and six (6wk; 3 wk after the second vaccine dose) weeks after the first dose of the BNT162b2 vaccine. The data are represented as geometric means and geometric SDs. **B.** Correlation between anti-S1 IgG and total Ig responses in 1:1000 diluted sera and neutralization titres against FIN-25 virus isolate. Neutralization titres <20 were plotted as 10. Spearman's rank correlation coefficient (r) is indicated with two-tailed p-value.

**Supplementary Table 1 Complete list of primer pools targeting SARS-CoV-2 used in the study.**

| Name        | Sequence                       | Pool |
|-------------|--------------------------------|------|
| NC_1_LEFT   | ACCAACCAACTTTCGATCTCTTGT       | 1    |
| NC_1_RIGHT  | CGAGCATCCGAACGTTTGATGA         | 1    |
| NC_2_LEFT   | TCTTAAAGATGGCACTTGTGGCT        | 2    |
| NC_2_RIGHT  | ATGCACTCAAGAGGGTAGCCAT         | 2    |
| NC_3_LEFT   | AGTGGTGTTACCCGTGAACTCA         | 1    |
| NC_3_RIGHT  | CGTCTGCCATGAAGTTTCACCA         | 1    |
| NC_4_LEFT   | TCGATCTGTCTATCCAGTTGCGT        | 2    |
| NC_4_RIGHT  | AAGGTTGTCATTAAGACCTTCGGAAC     | 2    |
| NC_5_LEFT   | GGTTGCCATAACAAGTGTGCCT         | 1    |
| NC_5_RIGHT  | TAGCGGCCTTCTGTAAAACACG         | 1    |
| NC_6_LEFT   | CATTTGCATCAGAGGCTGCTCG         | 2    |
| NC_6_RIGHT  | AGAGTCAGCACACAAAGCCAAA         | 2    |
| NC_7_LEFT   | TGCTTGTGAAATTGTCGGTGGA         | 1    |
| NC_7_RIGHT  | AGTAACCTTTGTTGGTGCACCG         | 1    |
| NC_8_LEFT   | TGTTGCTCGAAATCAAAGACACAGA      | 2    |
| NC_8_RIGHT  | AGTGGCACCAAATTCCAAAGGT         | 2    |
| NC_9_LEFT   | TGAGGATGAAGAAGAAGGTGATTGTG     | 1    |
| NC_9_RIGHT  | TCCGCTTAAAACACA ACTACCACC      | 1    |
| NC_10_LEFT  | AGGTGTTGCAGGAGCCTTAAAT         | 2    |
| NC_10_RIGHT | TCTTGTTTTCTCTGTTCAACTGAAGGT    | 2    |
| NC_11_LEFT  | TGAAGAGTGAAAAGCAAGTTGAACAA     | 1    |
| NC_11_RIGHT | AAGCACTGTCTTTGCCTCCTCT         | 1    |
| NC_12_LEFT  | CGAAAGCTTTGAGAAAAGTGCCA        | 2    |
| NC_12_RIGHT | ACCGAGCAGCTTCTTCCAAATT         | 2    |
| NC_13_LEFT  | ACTGTAGCGTCACTTATCAACACAC      | 1    |
| NC_13_RIGHT | CACA ACTTGCGTGTGGAGGTTA        | 1    |
| NC_14_LEFT  | TCACCTTTGACAATCTTAAGACACTTCT   | 2    |
| NC_14_RIGHT | GCACAAAAGTTAGCAGCTTCACC        | 2    |
| NC_15_LEFT  | GCCACTGCATTGTTAACACTCC         | 1    |
| NC_15_RIGHT | AGCACCGTCTATGCAATACAAAGT       | 1    |
| NC_16_LEFT  | CAGTATGAACTTAAGCATGGTACATTTACT | 2    |
| NC_16_RIGHT | AGCCACCACATCACCATTTAAGT        | 2    |
| NC_17_LEFT  | CCATATCCAAACGCAAGCTTCG         | 1    |
| NC_17_RIGHT | TGTGTGGCCAACCTCTTCTGTA         | 1    |
| NC_18_LEFT  | CCATACAGAAAGACGTTCTTGAGTGT     | 2    |
| NC_18_RIGHT | GCCTCTAGACAAAATTTACCGACACT     | 2    |
| NC_19_LEFT  | AAACCGTGTTTGTACTAATTATATGCCTT  | 1    |
| NC_19_RIGHT | TGCCAAAACCACTCTGCAACT          | 1    |
| NC_20_LEFT  | GTGGTTTAGATTCTTTAGACACCTATCCT  | 2    |
| NC_20_RIGHT | AGTTTGCAAAAAGCCTTTACCTCCA      | 2    |
| NC_21_LEFT  | AACGTAATAGAGCAACAAGAGTCGA      | 1    |

|             |                               |   |
|-------------|-------------------------------|---|
| NC_21_RIGHT | GCAACTTCCGCACTATCACCAA        | 1 |
| NC_22_LEFT  | TCATCTGCAAAATCAGCGTCTGT       | 2 |
| NC_22_RIGHT | TGACTTTTTGCTACCTGCGCAT        | 2 |
| NC_23_LEFT  | AGAAGTTACTGGCGATAGTTGTAATAACT | 1 |
| NC_23_RIGHT | TAACTACCACCACGCTGGCTAA        | 1 |
| NC_24_LEFT  | AGGCTATTGATGGTGGTGTCAC        | 2 |
| NC_24_RIGHT | AGCCATCCATGAGCACATAACG        | 2 |
| NC_25_LEFT  | TGGTAAGCCAGTACCATATTGTTATGA   | 1 |
| NC_25_RIGHT | GGCAACTACATGACTGTATTCACCA     | 1 |
| NC_26_LEFT  | AGCATCTATAGTAGCTGGTGGTATTGT   | 2 |
| NC_26_RIGHT | AGCACATCACTACGCAACTTTAGA      | 2 |
| NC_27_LEFT  | ACGTGTAGTCTTTAATGGTGTTTCCT    | 1 |
| NC_27_RIGHT | AGCATGTCTTCAGAGGTGCAGA        | 1 |
| NC_28_LEFT  | TCCCATCTGGTAAAGTTGAGGGT       | 2 |
| NC_28_RIGHT | ACCTTCTAAGTCTGTGCCAGCA        | 2 |
| NC_29_LEFT  | TGGTTCATGTGGTAGTGTTGGTT       | 1 |
| NC_29_RIGHT | AACCAGTGGTGTGTACCCTTGA        | 1 |
| NC_30_LEFT  | GGACGTACCATATTGGGTAGTGC       | 2 |
| NC_30_RIGHT | GTCCACACTCTCCTAGCACCAT        | 2 |
| NC_31_LEFT  | TGTCTGGTTTTAAGCTAAAAGACTGTGT  | 1 |
| NC_31_RIGHT | TGCCACCAACACCCAACAATTT        | 1 |
| NC_32_LEFT  | CCGCTACTTTAGACTGACTCTTGG      | 2 |
| NC_32_RIGHT | ATCACCATTAGCAACAGCCTGC        | 2 |
| NC_33_LEFT  | GGCAACCTTACAAGCTATAGCCT       | 1 |
| NC_33_RIGHT | GGATTTCCACAATGCTGATGC         | 1 |
| NC_34_LEFT  | ACCTCTTACAACAGCAGCCAAAC       | 2 |
| NC_34_RIGHT | CCTACAAGGTGGTTCCAGTTCTG       | 2 |
| NC_35_LEFT  | GGAGGTAGGTTTGTACTTGCACTG      | 1 |
| NC_35_RIGHT | CTATGTGGCAACGGCAGTACAG        | 1 |
| NC_36_LEFT  | AACTGGTACTGGTCAGGCAAT         | 2 |
| NC_36_RIGHT | CGTCCTTTTCTTGGAAGCGACA        | 2 |
| NC_37_LEFT  | ACAGGCACTAGTACTGATGTCGT       | 1 |
| NC_37_RIGHT | AATACCAGCATTTTCGCATGGCA       | 1 |
| NC_38_LEFT  | TGTAGAAAACCCAGATATATTACGCGT   | 2 |
| NC_38_RIGHT | GTGGTCCAAAACCTTGTAGGTGGG      | 2 |
| NC_39_LEFT  | TCAGACATAACCACCAAATTGTGT      | 1 |
| NC_39_RIGHT | GCAGCATTACCATCCTGAGCAA        | 1 |
| NC_40_LEFT  | ACAAAGACTTCTATGACTTTGCTGTGT   | 2 |
| NC_40_RIGHT | CTCCTCTAGTGGCGGCTATTGA        | 2 |
| NC_41_LEFT  | TGCAAAGAATAGAGCTCGCACC        | 1 |
| NC_41_RIGHT | TGCATTAACATTGGCCGTGACA        | 1 |
| NC_42_LEFT  | TGGCGGTTCACTATATGTTAAACCA     | 2 |
| NC_42_RIGHT | GGCCCCTAGGATTCTTGATGGA        | 2 |
| NC_43_LEFT  | ACTAAAGGACCTCATGAATTTTGCTCT   | 1 |
| NC_43_RIGHT | TGGTCTACGTATGCAAGCACCA        | 1 |

|             |                             |   |
|-------------|-----------------------------|---|
| NC_44_LEFT  | TGAGGCTATGTACACACCGCAT      | 2 |
| NC_44_RIGHT | CTCTGTCAGACAGCACTTCACG      | 2 |
| NC_45_LEFT  | TCAAGCTTTTTGCAGCAGAAACG     | 1 |
| NC_45_RIGHT | TGCGAGCAGAAGGGTAGTAGAG      | 1 |
| NC_46_LEFT  | TGCAAATTATCAAAAGGTTGGTATGCA | 2 |
| NC_46_RIGHT | CCGAGGAACATGTCTGGACCTA      | 2 |
| NC_47_LEFT  | GCACCACGCACATTGCTAACTA      | 1 |
| NC_47_RIGHT | ACAAGAGTGAGCTGTTTCAGTGG     | 1 |
| NC_48_LEFT  | TGCTGTAGCCTCAAAGATTTTGGG    | 2 |
| NC_48_RIGHT | GCTTCTTCGCGGGTGATAACA       | 2 |
| NC_49_LEFT  | TGGCATAACCTAAGGACATGACCT    | 1 |
| NC_49_RIGHT | CATAGACAACAGGTGCGCTCAG      | 1 |
| NC_50_LEFT  | CTCTCTGACAGAGTCGTATTTGTCTT  | 2 |
| NC_50_RIGHT | ACCAATGTTCGTGAAGAACTGGG     | 2 |
| NC_51_LEFT  | TGATGAACTGAAGATTAATGCGGCT   | 1 |
| NC_51_RIGHT | AGACTCACATGGACTGTCAGAGT     | 1 |
| NC_52_LEFT  | ATAAACATGCATTCCACACACCAG    | 2 |
| NC_52_RIGHT | TGGTACTGGTTTAATGTTGCGCT     | 2 |
| NC_53_LEFT  | ACTGTTTACACAAAAGTTGATGGTGT  | 1 |
| NC_53_RIGHT | TGTTGGACAACACCATCAACTTTCT   | 1 |
| NC_54_LEFT  | CCATCTGTAGGTCCCAAACAAGC     | 2 |
| NC_54_RIGHT | TCACTTTGACAACCTTAGAACTACAGA | 2 |
| NC_55_LEFT  | AGATGCGCAAACAGGTTTCATCT     | 1 |
| NC_55_RIGHT | GATCTGAATCGACAAGCAGCGT      | 1 |
| NC_56_LEFT  | TGAGAGTTATACATTTTGGTGCTGGT  | 2 |
| NC_56_RIGHT | CTATTTGTTTCGCGTGGTTTGCC     | 2 |
| NC_57_LEFT  | GCATGGTGGACAGCCTTTGTTA      | 1 |
| NC_57_RIGHT | CAGGGTAATAAACACCACGTGTGA    | 1 |
| NC_58_LEFT  | TGTTTTATTGCCACTAGTCTCTAGTCA | 2 |
| NC_58_RIGHT | AGGTCCATAAGAAAAGGCTGAGAGA   | 2 |
| NC_59_LEFT  | CCACAAAACAACAAAAGTTGGATGG   | 1 |
| NC_59_RIGHT | TCTGAGAGAGGGTCAAGTGCAC      | 1 |
| NC_60_LEFT  | GTGCTGCAGCTTATTATGTGGGT     | 2 |
| NC_60_RIGHT | TTCCAAGCTATAACGCAGCCTG      | 2 |
| NC_61_LEFT  | TGAAGTCAGACAAATCGCTCCAG     | 1 |
| NC_61_RIGHT | ACGGACAGCATCAGTAGTGCA       | 1 |
| NC_62_LEFT  | TGGTTTAACAGGCACAGGTGTT      | 2 |
| NC_62_RIGHT | GCACCAAGTGACATAGTGTAGGC     | 2 |
| NC_63_LEFT  | ACCCATTGGTGCAGGTATATGC      | 1 |
| NC_63_RIGHT | TGATGAAGCCAGCATCTGCAAG      | 1 |
| NC_64_LEFT  | AGTCAAACAATTTACAAAACACCACCA | 2 |
| NC_64_RIGHT | GCTTGTGCATTTTGGTTGACCA      | 2 |
| NC_65_LEFT  | GCCAACCAATTTAATAGTGCTATTGGC | 1 |
| NC_65_RIGHT | CATGACAAATGGCAGGAGCAGT      | 1 |
| NC_66_LEFT  | CTTCCCTCAGTCAGCACCTCAT      | 2 |

|             |                                |   |
|-------------|--------------------------------|---|
| NC_66_RIGHT | CAAGCCAGCTATAAAACCTAGCCA       | 2 |
| NC_67_LEFT  | TGAGGTTGCCAAGAATTTAAATGAATCT   | 1 |
| NC_67_RIGHT | TGGAGAGTGCTAGTTGCCATCT         | 1 |
| NC_68_LEFT  | TTCGGATGGCTTATTGTTGGCG         | 2 |
| NC_68_RIGHT | ACACAGTCTTTTACTCCAGATTCCC      | 2 |
| NC_69_LEFT  | GTCATTACTIONCAGGTGATGGCACA     | 1 |
| NC_69_RIGHT | ACACAATCGAAGCGCAGTAAGG         | 1 |
| NC_70_LEFT  | CGTTTCGGAAGAGACAGGTACG         | 2 |
| NC_70_RIGHT | GCAATTCCACCGGTGATCCAAT         | 2 |
| NC_71_LEFT  | CTATGCCAACAGGAATAGGTTTTTGT     | 1 |
| NC_71_RIGHT | TGCCAATCCTGTAGCGACTGTA         | 1 |
| NC_72_LEFT  | CTGTTGCTACATCACGAACGCT         | 2 |
| NC_72_RIGHT | TGCCCTCGTATGTTCCAGAAGA         | 2 |
| NC_73_LEFT  | CTTGGCACTGATAACACTIONCGCT      | 1 |
| NC_73_RIGHT | TGTTTCGTTTAGGCGTGACAAGT        | 1 |
| NC_74_LEFT  | TTTGTGCTTTTTAGCCTTTCTGCT       | 2 |
| NC_74_RIGHT | TGCATTTTCGCTGATTTTGGGGT        | 2 |
| NC_75_LEFT  | ATGAAGACTTTTTAGAGTATCATGACGTTC | 1 |
| NC_75_RIGHT | GATGCCGTCTTTGTTAGCACCA         | 1 |
| NC_76_LEFT  | CGTGGTGGTGACGGTAAAATGA         | 2 |
| NC_76_RIGHT | GCTTCTTAGAAGCCTCAGCAGC         | 2 |
| NC_77_LEFT  | TGCTTGACAGATTGAACCAGCT         | 1 |
| NC_77_RIGHT | TCTGCAGCAGGAAGAAGAGTCA         | 1 |
| NC_78_LEFT  | ACATTCCCACCAACAGAGCCTA         | 2 |
| NC_78_RIGHT | TTAGGGCTCTTCCATATAGGCAGC       | 2 |
